# Supplementary material for: GABA-Producing Lactococcus lactis Strains Isolated from Camel’s Milk as Starters for the Production of GABA-Enriched Cheese
Source: PubMed Central journal article supplement (PMC8002479; doi:10.3390/foods10030633), 2021-03-17
Supplement: foods-10-00633-s001.pdf [file foods-10-00633-s001.pdf]

**Table S1.** Genome features of the GABA-producing *L. lactis* isolates.

| <i>L. lactis</i> isolates | Genome length (bp) | GC content (%) | N° of contigs | Largest contig (bp) | N50 (bp) | Protein coding genes | tRNAs | rRNAs |
|---------------------------|--------------------|----------------|---------------|---------------------|----------|----------------------|-------|-------|
| LEY6                      | 2,872,551          | 35.18          | 118           | 218,259             | 148,151  | 3057                 | 55    | 7     |
| LEY7                      | 2,814,330          | 35.17          | 114           | 181,253             | 146,341  | 2990                 | 55    | 7     |
| LEY8                      | 2,815,350          | 35.17          | 115           | 219,716             | 148,151  | 2993                 | 55    | 7     |
| LEY11                     | 2,513,704          | 34.81          | 38            | 194,818             | 220,736  | 2535                 | 57    | 7     |
| LEY12                     | 2,514,212          | 34.80          | 36            | 194,818             | 220,736  | 2537                 | 57    | 7     |
| LEY13                     | 2,513,815          | 34.80          | 34            | 670,398             | 220,736  | 2533                 | 57    | 7     |

**Table S2.** Annotation and localization (*locus\_tag*) of the main features related to technological, functional and safety properties in the genomes of the GABA-producing *L. lactis* isolates.

| <b>Features</b>                                |             |                       |                       |                       |                        |                        |                        |
|------------------------------------------------|-------------|-----------------------|-----------------------|-----------------------|------------------------|------------------------|------------------------|
| <b>GAD gene cluster</b>                        |             | <i>L. lactis</i> LEY6 | <i>L. lactis</i> LEY7 | <i>L. lactis</i> LEY8 | <i>L. lactis</i> LEY11 | <i>L. lactis</i> LEY12 | <i>L. lactis</i> LEY13 |
| <b>Gene annotation</b>                         | <b>Gene</b> | <b>Locus_tag</b>      | <b>Locus_tag</b>      | <b>Locus_tag</b>      | <b>Locus_tag</b>       | <b>Locus_tag</b>       | <b>Locus_tag</b>       |
| Rgg/GadR/MutR family transcriptional regulator | <i>gadR</i> | GQ675_06340           | GRR92_07225           | GRR91_06335           | GRR90_01045            | GRR87_01045            | GRR88_02000            |
| Glutamate:gamma-aminobutyrate antiporter       | <i>gadC</i> | GQ675_06335           | GRR92_07230           | GRR91_06330           | GRR90_01050            | GRR87_01050            | GRR88_01995            |
| Glutamate decarboxylase                        | <i>gadB</i> | GQ675_06330           | GRR92_07235           | GRR91_06325           | GRR90_01055            | GRR87_01055            | GRR88_01990            |
| <b>Lactose phosphotranferase operon</b>        |             |                       |                       |                       |                        |                        |                        |
|                                                |             | <i>L. lactis</i> LEY6 | <i>L. lactis</i> LEY7 | <i>L. lactis</i> LEY8 | <i>L. lactis</i> LEY11 | <i>L. lactis</i> LEY12 | <i>L. lactis</i> LEY13 |
| <b>Gene annotation</b>                         | <b>Gene</b> | <b>Locus_tag</b>      | <b>Locus_tag</b>      | <b>Locus_tag</b>      | <b>Locus_tag</b>       | <b>Locus_tag</b>       | <b>Locus_tag</b>       |
| Lactose phosphotransferase system repressor    | <i>lacR</i> | GQ675_13430           | GRR92_13315           | GRR91_13265           | GRR90_11865            | GRR87_11830            | GRR88_12085            |
| Galactose-6-phosphate isomerase subunit LacA   | <i>lacA</i> | GQ675_13435           | GRR92_13310           | GRR91_13270           | GRR90_11860            | GRR87_11835            | GRR88_12080            |
| Galactose-6-phosphate isomerase subunit LacB   | <i>lacB</i> | GQ675_13440           | GRR92_13305           | GRR91_13275           | GRR90_11855            | GRR87_11840            | GRR88_12075            |
| Tagatose-6-phosphate kinase                    | <i>lacC</i> | GQ675_13445           | GRR92_13300           | GRR91_13280           | GRR90_11850            | GRR87_11845            | GRR88_12070            |
| Tagatose 1,6-bisphosphate aldolase             | <i>lacD</i> | GQ675_13450           | GRR92_13295           | GRR91_13285           | GRR90_11845            | GRR87_11850            | GRR88_12065            |
| PTS system, lactose-specific IIA component     | <i>lacF</i> | GQ675_13455           | GRR92_13290           | GRR91_13290           | GRR90_11840            | GRR87_11855            | GRR88_12060            |
| PTS system, lactose-specific IIBC component    | <i>lacE</i> | GQ675_13460           | GRR92_13285           | GRR91_13295           | GRR90_11835            | GRR87_11860            | GRR88_12055            |
| 6-phospho-beta-galactosidase                   | <i>lacG</i> | GQ675_13465           | GRR92_13280           | GRR91_13300           | GRR90_11830            | GRR87_11865            | GRR88_12050            |
| Aldose 1-epimerase                             | <i>lacX</i> | GQ675_13475           | GRR92_13270           | GRR91_13310           | GRR90_11820            | GRR87_11875            | GRR88_12040            |
| <b>PrtP/PrtM proteolytic system</b>            |             |                       |                       |                       |                        |                        |                        |
|                                                |             | <i>L. lactis</i> LEY6 | <i>L. lactis</i> LEY7 | <i>L. lactis</i> LEY8 | <i>L. lactis</i> LEY11 | <i>L. lactis</i> LEY12 | <i>L. lactis</i> LEY13 |
| <b>Gene annotation</b>                         | <b>Gene</b> | <b>Locus_tag</b>      | <b>Locus_tag</b>      | <b>Locus_tag</b>      | <b>Locus_tag</b>       | <b>Locus_tag</b>       | <b>Locus_tag</b>       |
| Proteinase                                     | <i>prtP</i> | GQ675_13980           | GRR92_13700           | GRR91_13740           | GRR90_12010            | GRR87_12095            | GRR88_11930            |
| Peptidyl-prolyl isomerase, maturation protein  | <i>prtM</i> | GQ675_13975           | GRR92_13705           | GRR91_13735           | GRR90_12005            | GRR87_12090            | GRR88_11935            |

Table S2 (continued)

| <b>Oligopeptide permease system</b>                                   |             | <i>L. lactis</i> LEY6 | <i>L. lactis</i> LEY7 | <i>L. lactis</i> LEY8 | <i>L. lactis</i> LEY11 | <i>L. lactis</i> LEY12 | <i>L. lactis</i> LEY13 |
|-----------------------------------------------------------------------|-------------|-----------------------|-----------------------|-----------------------|------------------------|------------------------|------------------------|
| <b>Gene annotation</b>                                                | <b>Gene</b> | <b>Locus_tag</b>      | <b>Locus_tag</b>      | <b>Locus_tag</b>      | <b>Locus_tag</b>       | <b>Locus_tag</b>       | <b>Locus_tag</b>       |
| Oligopeptide transport ATP-binding protein OppD                       | <i>oppD</i> | GQ675_14520           | GRR92_14260           | GRR91_14230           | GRR90_12400            | GRR87_12445            | GRR88_12450            |
| Oligopeptide transport ATP-binding protein OppF                       | <i>oppF</i> | GQ675_14525           | GRR92_14265           | GRR91_14235           | GRR90_12405            | GRR87_12440            | GRR88_12445            |
| Oligopeptide transport system permease protein OppB                   | <i>oppB</i> | GQ675_14530           | GRR92_14270           | GRR91_14240           | GRR90_12410            | GRR87_12435            | GRR88_12440            |
| Oligopeptide transport system permease protein OppC                   | <i>oppC</i> | GQ675_11395           | GRR92_14275           | GRR91_14245           | GRR90_12415            | GRR87_12430            | GRR88_12435            |
| Oligopeptide binding protein OppA                                     | <i>oppA</i> | GQ675_11390           | GRR92_14325           | GRR91_14270           | GRR90_12440            | GRR87_12455            | GRR88_12455            |
| <b>Citrate utilization</b>                                            |             |                       |                       |                       |                        |                        |                        |
| <b>Gene annotation</b>                                                | <b>Gene</b> | <b>Locus_tag</b>      | <b>Locus_tag</b>      | <b>Locus_tag</b>      | <b>Locus_tag</b>       | <b>Locus_tag</b>       | <b>Locus_tag</b>       |
| Citrate:sodium symporter                                              | -           | GQ675_14140           | GRR92_13885           | GRR91_13915           | GRR90_02815            | GRR87_02815            | GRR88_00230            |
| Oxaloacetate-decarboxylating malate dehydrogenase                     | <i>maeA</i> | GQ675_14145           | GRR92_13880           | GRR91_13910           | GRR90_02820            | GRR87_02820            | GRR88_00225            |
| <b>Bacteriocins<sup>a</sup></b>                                       |             |                       |                       |                       |                        |                        |                        |
| <b>Gene annotation</b>                                                | <b>Gene</b> | <b>Locus_tag</b>      | <b>Locus_tag</b>      | <b>Locus_tag</b>      | <b>Locus_tag</b>       | <b>Locus_tag</b>       | <b>Locus_tag</b>       |
| Type A2 lantipeptide                                                  |             | GQ675_10525           | GRR92_10240           | GRR91_10245           |                        |                        |                        |
| Gallidermin/nisin family lantibiotic                                  |             |                       |                       |                       | GRR90_11940            | GRR87_09650            | GRR88_12205            |
| Type 2 lantibiotic                                                    |             |                       |                       |                       | GRR90_09375            | GRR87_09055            | GRR88_09380            |
| Type 2 lantibiotic                                                    |             |                       |                       |                       | GRR90_09380            | GRR87_09060            | GRR88_09385            |
|                                                                       |             |                       |                       |                       |                        |                        |                        |
| <b>AGDI cluster</b>                                                   |             |                       |                       |                       |                        |                        |                        |
| <b>Gene annotation</b>                                                | <b>Gene</b> | <b>Locus_tag</b>      | <b>Locus_tag</b>      | <b>Locus_tag</b>      | <b>Locus_tag</b>       | <b>Locus_tag</b>       | <b>Locus_tag</b>       |
| Transcriptional regulator of the putrescine production cluster (AguR) | <i>aguR</i> | GQ675_08305           | GRR92_07575           | GRR91_08020           | GRR90_06180            | GRR87_06180            | GRR88_06185            |
| Putrescine carbamoyltransferase (AguB)                                | <i>aguB</i> | GQ675_08310           | GRR92_07580           | GRR91_08015           | GRR90_06175            | GRR87_06175            | GRR88_06180            |

|                                       |             |             |             |             |             |             |             |
|---------------------------------------|-------------|-------------|-------------|-------------|-------------|-------------|-------------|
| Agmatine/putrescine antiporter (AguD) | <i>aguD</i> | GQ675_08315 | GRR92_07585 | GRR91_08010 | GRR90_06170 | GRR87_06170 | GRR88_06175 |
| Agmatine deiminase (AguA)             | <i>aguA</i> | GQ675_08320 | GRR92_07590 | GRR91_08005 | GRR90_06165 | GRR87_06165 | GRR88_06170 |
| Carbamate kinase (AguC)               | <i>aguC</i> | GQ675_08325 | GRR92_07595 | GRR91_08000 | GRR90_06160 | GRR87_06160 | GRR88_06165 |

<sup>a</sup> Bagel software was used to predict putative bacteriocin clusters in the genome of *L. lactis* isolates; only the locus\_tag corresponding to the genes encoding bacteriocin peptides is indicated.
